# Supplementary material for: Acetamiprid Affects Destruxins Production but Its Accumulation in Metarhizium sp. Spores Increases Infection Ability of Fungi
Source: PubMed Central journal article supplement (PMC7551442; doi:10.3390/toxins12090587), 2020-09-11
Supplement: toxins-12-00587-s001.pdf [file toxins-12-00587-s001.pdf]

# Supplementary Materials: Acetamiprid Affects Destruxins Production but Its Accumulation in *Metarhizium* sp. Spores Increases Infection Ability of Fungi

Monika Nowak, Przemysław Bernat, Julia Mrozińska and Sylwia Różalska

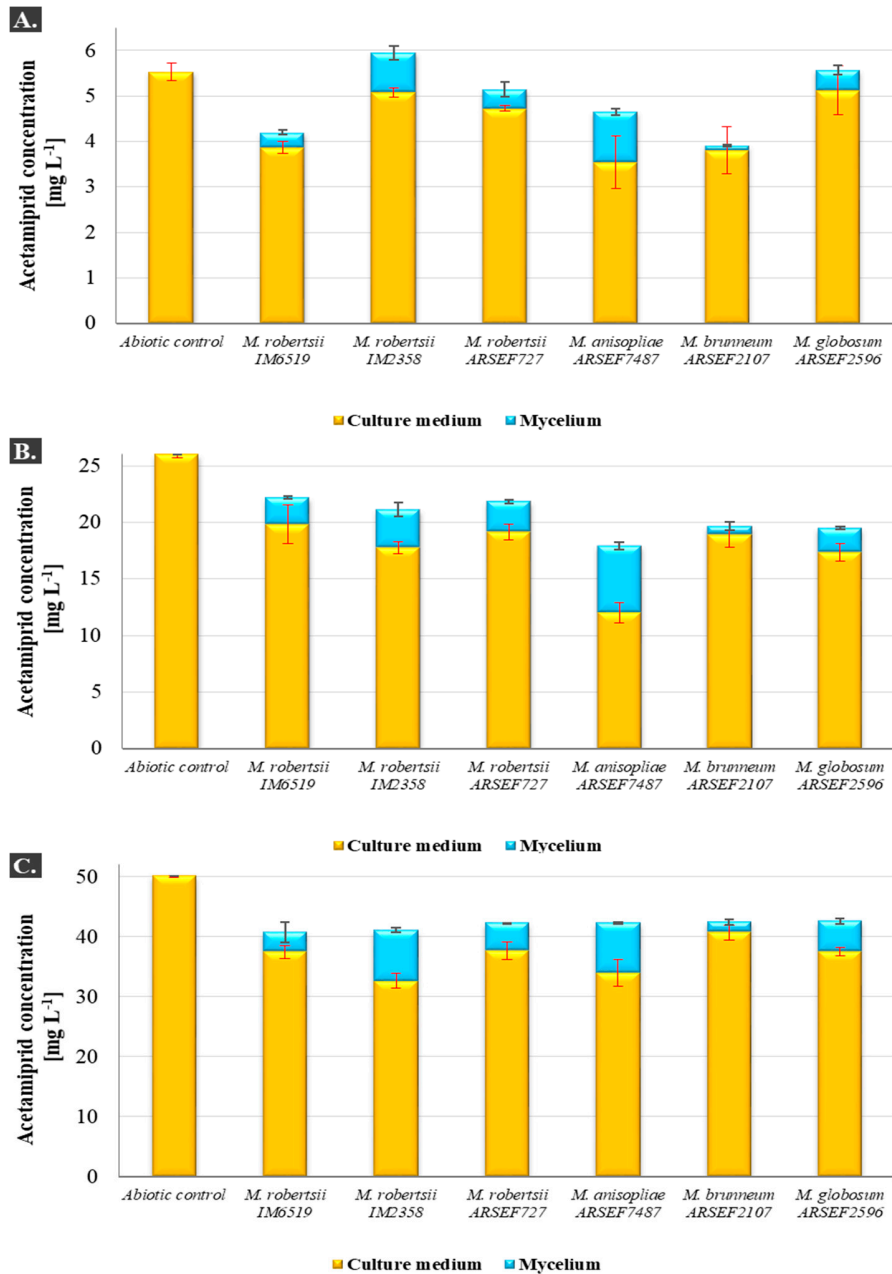

**Figure S1.** Elimination of acetamiprid at the concentrations of 5 (A), 25 (B) and 50 mg L<sup>-1</sup> (C) after 7 days of incubation by *Metarhizium* sp. considering the residual content in the culture medium and mycelium.

**Table S1.** Effect of acetamiprid on the permeability of the *Metarhizium brunneum* ARSEF2107 fungal cell wall.

| Propidium Iodide Fluorescence |                  |
|-------------------------------|------------------|
| Control                       | 3162.01 ± 306.53 |
| ACET 5 mg L <sup>-1</sup>     | 3755.66 ± 527.62 |
| ACET 25 mg L <sup>-1</sup>    | 3877.92 ± 559.02 |
| ACET 50 mg L <sup>-1</sup>    | 3643.73 ± 318.41 |

**Table S2.** Multiple Reaction Monitoring (MRM) parameters for determining 19 types of destruxins.

| No. | Destruxin | Q1 Mass (Da) | Q3 Mass (Da) | Retention Time (min) | Collision Energy [V] | Declustering Potential [V] | Entrance Potential [V] | Collision Cell Exit Potential [V] |
|-----|-----------|--------------|--------------|----------------------|----------------------|----------------------------|------------------------|-----------------------------------|
| 1.  | A         | 578          | 437<br>178   | 3.19                 | 41<br>51             | 106                        | 10                     | 14                                |
| 2.  | B         | 594          | 453<br>194   | 3.28                 | 45<br>38             | 106                        | 10                     | 14                                |
| 3.  | C         | 610          | 469<br>210   | 2.89                 | 40<br>32             | 106                        | 10                     | 14                                |
| 4.  | D         | 624          | 483<br>224   | 2.97                 | 30<br>40             | 106                        | 10                     | 14                                |
| 5.  | Ed        | 612          | 417<br>212   | 3.04                 | 32<br>40             | 106                        | 10                     | 14                                |
| 6.  | F         | 596          | 455<br>196   | 3.1                  | 38<br>45             | 106                        | 10                     | 14                                |
| 7.  | A1        | 592          | 451<br>192   | 3.24                 | 38<br>45             | 106                        | 10                     | 14                                |
| 8.  | B1        | 608          | 467<br>208   | 3.15                 | 32<br>40             | 106                        | 10                     | 14                                |
| 9.  | Ed1       | 626          | 485<br>226   | 2.96                 | 30<br>40             | 106                        | 10                     | 14                                |
| 10. | A2        | 564          | 423<br>178   | 3.13                 | 43<br>51             | 106                        | 10                     | 14                                |
| 11. | B2        | 580          | 439<br>194   | 3.23                 | 41<br>45             | 106                        | 10                     | 14                                |
| 12. | D2        | 610          | 469<br>224   | 2.88                 | 32<br>40             | 106                        | 10                     | 14                                |
| 13. | A3        | 566          | 425<br>166   | 3.18                 | 43<br>53             | 106                        | 10                     | 14                                |
| 14. | DesmA     | 564          | 437<br>178   | 3.12                 | 41<br>51             | 106                        | 10                     | 14                                |
| 15. | DesmB     | 580          | 453<br>194   | 3.24                 | 38<br>45             | 106                        | 10                     | 14                                |
| 16. | DesmC     | 596          | 469<br>210   | 3.08                 | 32<br>40             | 106                        | 10                     | 14                                |
| 17. | DesmB2    | 566          | 439          | 3.2                  | 41                   | 106                        | 10                     | 14                                |

|            |       |     |            |      |          |     |    |    |
|------------|-------|-----|------------|------|----------|-----|----|----|
|            |       |     | 194        |      | 45       |     |    |    |
| <b>18.</b> | CL    | 630 | 489<br>230 | 3.12 | 30<br>40 | 106 | 10 | 14 |
| <b>19.</b> | E2CL2 | 616 | 475<br>230 | 3.07 | 32<br>40 | 106 | 10 | 14 |
